# Supplementary material
Source: ML conference proceedings conference paper supplement (https://openreview.net/forum?id=O9SCxDji5A)
Supplement: supplementary_material [file Fig 1.pdf › Fig 1.pdf]

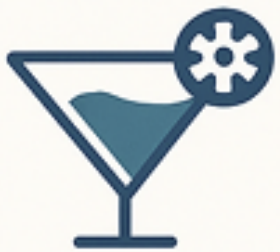

# CAI

## Cocktail AI Integration Model (CAI Model)

### 9+1 Dual-Brain Structure

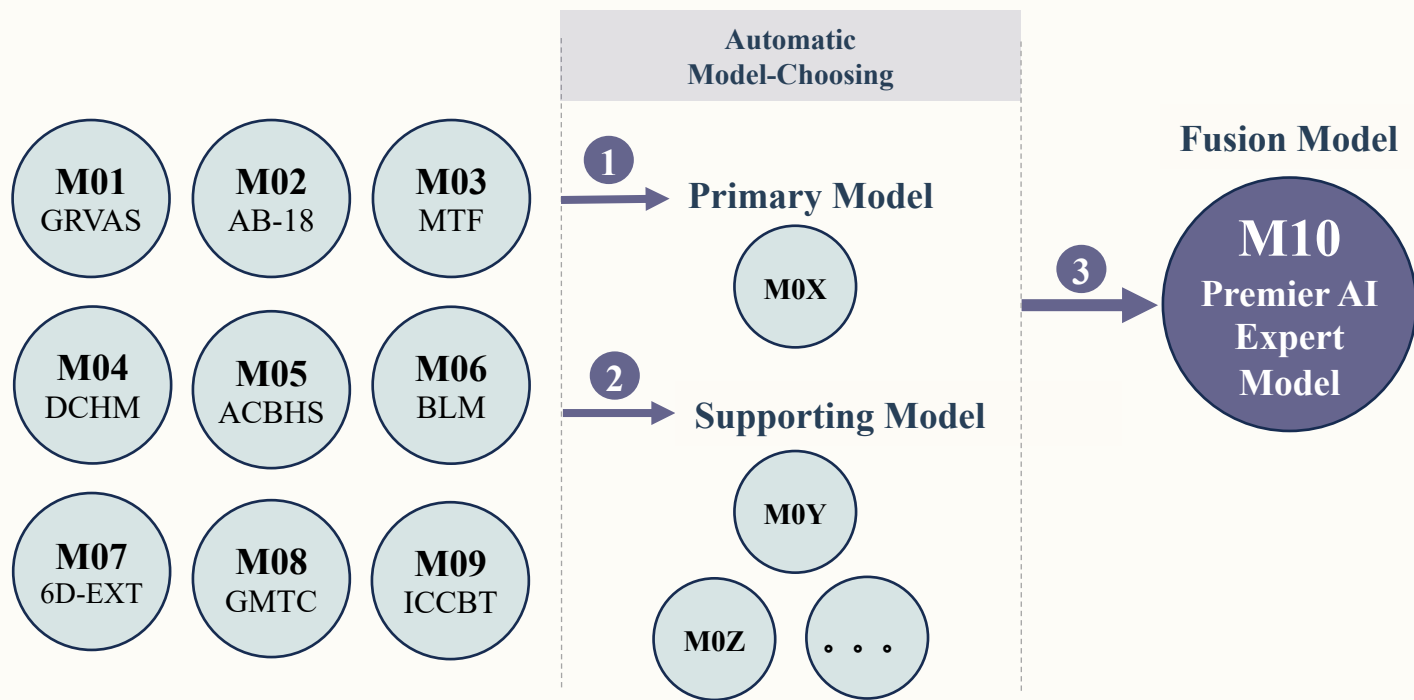

### 10 x 10 Complementarity Matrix

Dynamic synergy mapping

|   |   |   |   |   |   |   |   |   |   |
|---|---|---|---|---|---|---|---|---|---|
| — | ▲ | ▲ | ⊙ | ▲ | ⊙ | ⊙ | ▲ | ▲ | ⊙ |
| ▲ | — | ▲ | ▲ | ⊙ | ▲ | ◊ | ▲ | ▲ | ⊙ |
| ▲ | ▲ | — | ▲ | ▲ | ▲ | ⊙ | ▲ | ▲ | ⊙ |
| ⊙ | ▲ | ▲ | — | ▲ | ⊙ | ▲ | ▲ | ⊙ | ⊙ |
| ▲ | ⊙ | ▲ | ▲ | — | ▲ | ⊙ | ▲ | ▲ | ⊙ |
| ⊙ | ▲ | ▲ | ⊙ | ▲ | — | ▲ | ◊ | ▲ | ⊙ |
| ⊙ | ◊ | ⊙ | ▲ | ⊙ | ▲ | — | ▲ | ⊙ | ⊙ |
| ▲ | ▲ | ▲ | ▲ | ▲ | ◊ | ▲ | — | ▲ | ⊙ |
| ▲ | ▲ | ⊙ | ⊙ | ▲ | ▲ | ⊙ | ▲ | — | ⊙ |
| ⊙ | ⊙ | ⊙ | ⊙ | ⊙ | ⊙ | ⊙ | ⊙ | ⊙ | — |

### Performance Data

Novelty ↑15-25%

Feasibility ↑12-18%

Contradiction ↓30%

## AI as a Scientific Actor: From Hypothesis Generation to Validation
