# Supplementary material
Source: ML conference proceedings conference paper supplement (https://openreview.net/forum?id=O9SCxDji5A)

Reviewer ■ GPT5 ■ Gemini □ Copilot ▨ Claude ▩ Grok3

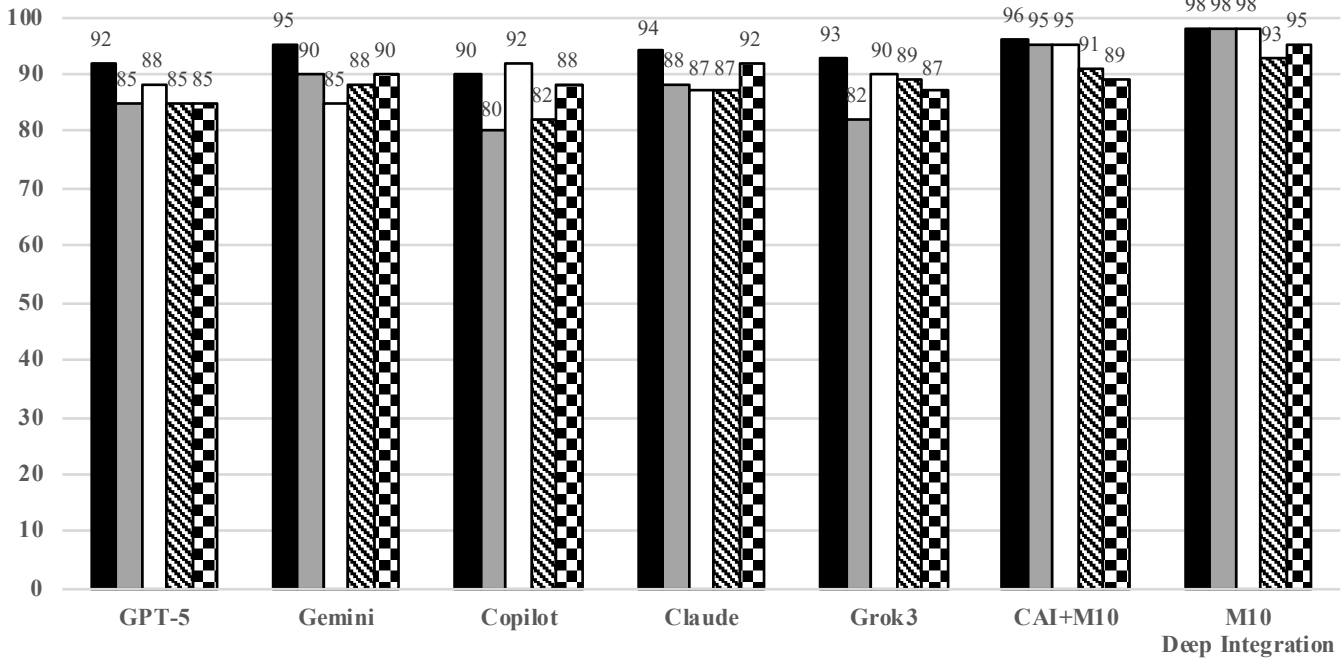

Supplement: supplementary_material [file Test 1.pdf › Test 1.pdf]

Reviewer ■ GPT5 ■ Gemini □ Copilot ▨ Claude ▩ Grok3

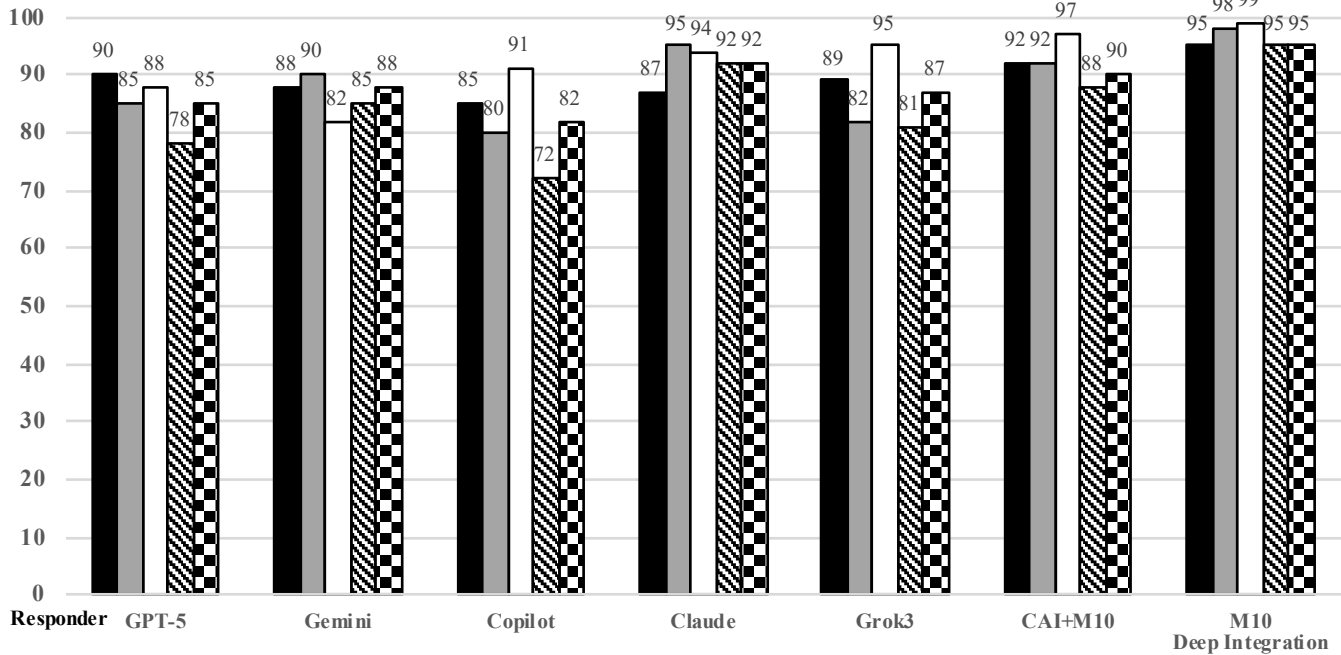

Supplement: supplementary_material [file Test 2.pdf › Test 2.pdf]

Reviewer ■ GPT5 ■ Gemini ■ Copilot ■ Claude ■ Grok3

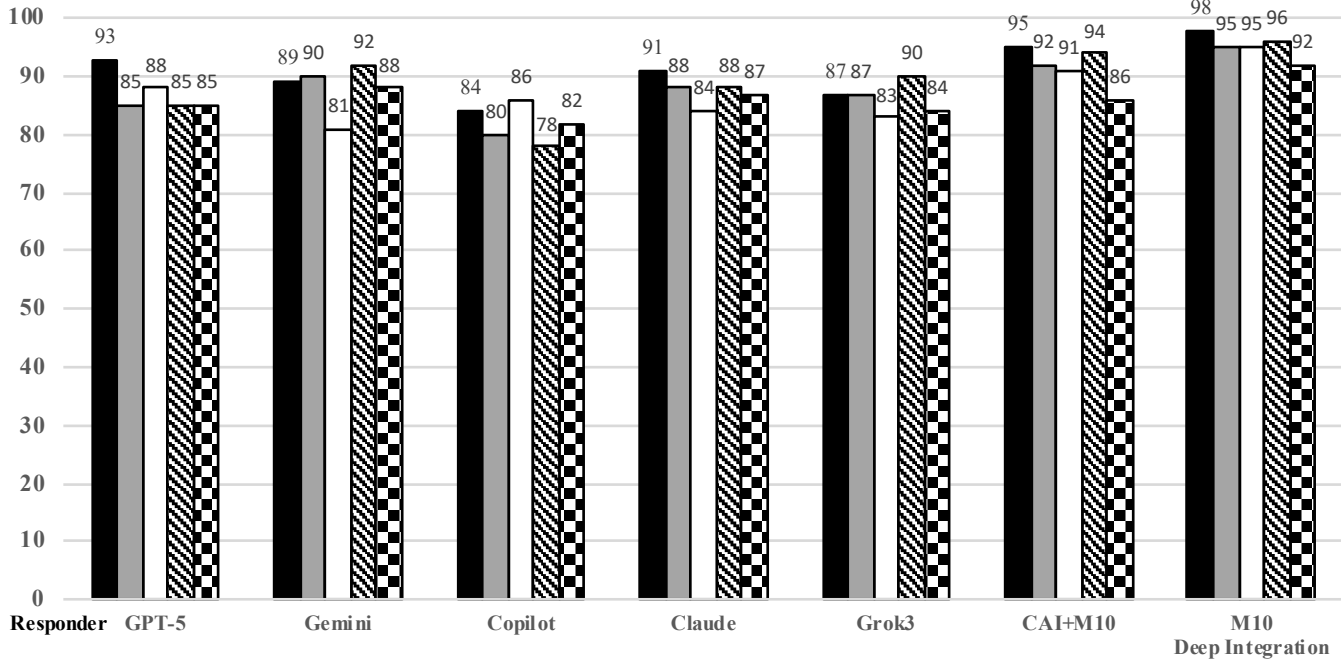

Supplement: supplementary_material [file Test 3.pdf › Test 3.pdf]
